# Supplementary material for: Enhancement of Crystallization Process of the Organic Pharmaceutical Molecules through High Pressure
Source: MDPI journal article supplement (doi:10.3390/cryst12030432), 2022-03-20
Supplement: s1 [file s1]

# Supplementary Materials: Enhancement of Crystallization Process of the Organic Pharmaceutical Molecules through High Pressure

Yaoguang Feng <sup>1</sup>, Hongxun Hao <sup>1,2</sup>, Yiqing Chen <sup>1</sup>, Na Wang <sup>1,2</sup>, Ting Wang <sup>1,2</sup> and Xin Huang <sup>1,2\*</sup>

**Table S1.** Mole fraction solubility of RBV (Form I) at 0.1 MPa and 12.0 MPa.

| T/K    | 10 <sup>3</sup> x |              |                   |              |
|--------|-------------------|--------------|-------------------|--------------|
|        | Dimethylformamide |              | Dimethylacetamide |              |
|        | p = 0.1 MPa       | p = 12.0 MPa | p = 0.1 MPa       | p = 12.0 MPa |
| 283.15 | 38.4              | 37.9         | 63.6              | 62.3         |
| 288.15 | 39.3              | 38.6         | 65.7              | 64.2         |
| 293.15 | 41.2              | 40.3         | 70.0              | 68.7         |
| 298.15 | 44.4              | 43.2         | 74.3              | 73.1         |
| 303.15 | 47.8              | 46.3         | 79.9              | 77.8         |
| 308.15 | 51.4              | 50.1         | 84.6              | 82.8         |
| 313.15 | 56.8              | 54.6         | 89.0              | 86.0         |
| 318.15 | 61.9              | 59.3         | 94.5              | 90.9         |
| 323.15 | 66.4              | 63.7         | 98.6              | 94.3         |

**Table S2.** Mole fraction solubility of RBV (Form I and Form II) in water at 0.1 MPa and 12.0 MPa.

| T/K    | 10 <sup>3</sup> x |              |             |              |
|--------|-------------------|--------------|-------------|--------------|
|        | Form I            |              | Form II     |              |
|        | p = 0.1 MPa       | p = 12.0 MPa | p = 0.1 MPa | p = 12.0 MPa |
| 283.15 | 5.08              | 4.19         | 5.43        | 4.56         |
| 288.15 | 5.97              | 5.01         | 6.25        | 5.49         |
| 293.15 | 7.38              | 6.63         | 7.93        | 7.10         |
| 298.15 | 9.97              | 9.02         | 10.9        | 9.49         |
| 303.15 | 13.6              | 11.6         | 14.4        | 11.9         |
| 308.15 | 17.6              | 15.3         | 18.5        | 16.0         |
| 313.15 | 23.8              | 20.4         | 25.1        | 21.3         |
| 318.15 | 30.7              | 28.2         | 32.6        | 29.2         |
| 323.15 | 38.5              | 36.4         | 41.4        | 37.2         |

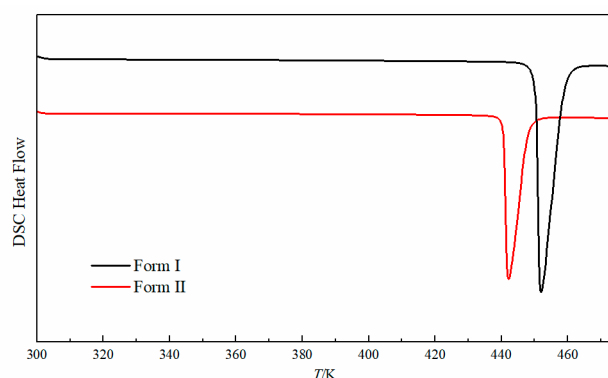

**Figure S1.** The DSC plots of the RBV raw material (Form I and Form II).

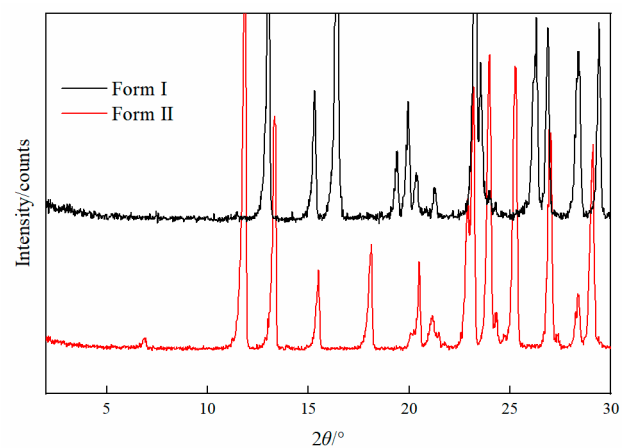

**Figure S2.** The PXRD patterns of the RBV raw material (Form I and Form II).

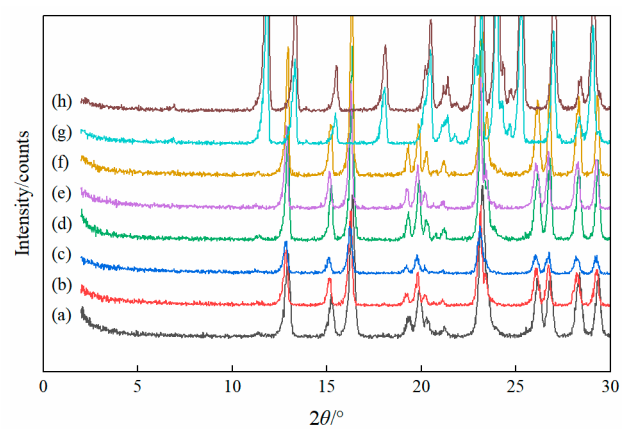

**Figure S3.** The PXRD patterns of residual solid in solubility experiment: (a–c) Form I in DMF, DMA, and water at 0.1 MPa, (d–f) Form I in DMF, DMA, and water at 12.0 MPa, (g) Form II in water at 0.1 MPa, (h) Form II in water at 12.0 MPa.

**Table S3.** The induction time and coefficient of variation of cooling crystallization of RBV in water at different pressures.

|                                                  | S     | Experimental $t_{ind}/\text{min}$ |      |      | Average | $c_v/\%$ |
|--------------------------------------------------|-------|-----------------------------------|------|------|---------|----------|
| $T = 283.15 \text{ K}$<br>$p = 0.1 \text{ MPa}$  | 1.909 | 1057                              | 1045 | 1016 | 1039    | 1.66     |
|                                                  | 2.011 | 879                               | 842  | 830  | 850     | 2.45     |
|                                                  | 2.113 | 687                               | 662  | 642  | 664     | 2.77     |
|                                                  | 2.215 | 470                               | 462  | 431  | 454     | 3.70     |
|                                                  | 2.316 | 261                               | 247  | 238  | 249     | 3.81     |
|                                                  | 2.418 | 141                               | 133  | 129  | 134     | 3.71     |
| $T = 283.15 \text{ K}$<br>$p = 5.0 \text{ MPa}$  | 1.909 | 760                               | 744  | 730  | 745     | 1.65     |
|                                                  | 2.011 | 573                               | 564  | 550  | 562     | 1.68     |
|                                                  | 2.113 | 496                               | 472  | 485  | 484     | 2.03     |
|                                                  | 2.215 | 366                               | 358  | 342  | 355     | 2.81     |
|                                                  | 2.316 | 176                               | 169  | 192  | 179     | 5.38     |
|                                                  | 2.418 | 105                               | 115  | 119  | 113     | 5.21     |
| $T = 283.15 \text{ K}$<br>$p = 10.0 \text{ MPa}$ | 1.909 | 620                               | 644  | 607  | 624     | 2.46     |
|                                                  | 2.011 | 499                               | 474  | 484  | 486     | 2.12     |
|                                                  | 2.113 | 409                               | 396  | 414  | 406     | 1.87     |
|                                                  | 2.215 | 287                               | 276  | 305  | 289     | 4.13     |
|                                                  | 2.316 | 153                               | 147  | 173  | 158     | 7.05     |
|                                                  | 2.418 | 101                               | 91   | 87   | 93      | 6.33     |
| $T = 293.15 \text{ K}$<br>$p = 0.1 \text{ MPa}$  | 1.914 | 955                               | 970  | 931  | 952     | 1.69     |
|                                                  | 2.016 | 736                               | 701  | 721  | 719     | 1.99     |
|                                                  | 2.119 | 537                               | 519  | 508  | 521     | 2.29     |
|                                                  | 2.221 | 287                               | 293  | 309  | 296     | 3.13     |
|                                                  | 2.324 | 205                               | 192  | 215  | 204     | 4.62     |
|                                                  | 2.427 | 148                               | 153  | 139  | 147     | 3.95     |
| $T = 293.15 \text{ K}$<br>$p = 5.0 \text{ MPa}$  | 1.914 | 717                               | 696  | 683  | 699     | 2.00     |
|                                                  | 2.016 | 519                               | 492  | 484  | 498     | 3.00     |
|                                                  | 2.119 | 401                               | 381  | 395  | 392     | 2.14     |
|                                                  | 2.221 | 181                               | 176  | 165  | 174     | 3.84     |
|                                                  | 2.324 | 119                               | 129  | 135  | 128     | 5.17     |
|                                                  | 2.427 | 84                                | 87   | 95   | 89      | 5.24     |
| $T = 293.15 \text{ K}$<br>$p = 10.0 \text{ MPa}$ | 1.914 | 551                               | 566  | 541  | 553     | 1.86     |
|                                                  | 2.016 | 417                               | 401  | 406  | 408     | 1.64     |
|                                                  | 2.119 | 312                               | 323  | 299  | 311     | 3.15     |
|                                                  | 2.221 | 128                               | 117  | 111  | 119     | 5.93     |
|                                                  | 2.324 | 91                                | 82   | 79   | 84      | 6.07     |
|                                                  | 2.427 | 59                                | 67   | 64   | 63      | 5.21     |
| $T = 303.15 \text{ K}$<br>$p = 0.1 \text{ MPa}$  | 1.718 | 842                               | 827  | 814  | 828     | 1.38     |
|                                                  | 1.821 | 515                               | 499  | 487  | 500     | 2.29     |
|                                                  | 1.925 | 274                               | 282  | 261  | 272     | 3.18     |
|                                                  | 2.030 | 226                               | 234  | 237  | 232     | 2.00     |
|                                                  | 2.134 | 186                               | 173  | 176  | 178     | 3.12     |
|                                                  | 1.718 | 604                               | 624  | 600  | 609     | 1.72     |
| $T = 303.15 \text{ K}$<br>$p = 5.0 \text{ MPa}$  | 1.821 | 353                               | 343  | 329  | 342     | 2.88     |
|                                                  | 1.925 | 203                               | 216  | 236  | 218     | 6.22     |
|                                                  | 2.030 | 168                               | 172  | 183  | 174     | 3.64     |
|                                                  | 2.134 | 126                               | 117  | 130  | 124     | 4.37     |
|                                                  | 1.718 | 515                               | 523  | 495  | 511     | 2.30     |
|                                                  | 1.821 | 231                               | 237  | 254  | 241     | 4.05     |
| $T = 303.15 \text{ K}$<br>$p = 10.0 \text{ MPa}$ | 1.925 | 158                               | 161  | 175  | 165     | 4.50     |
|                                                  | 2.030 | 131                               | 134  | 141  | 135     | 3.10     |
|                                                  | 2.134 | 101                               | 109  | 98   | 103     | 4.52     |
